25. Suzuki T, Morisaki H, Serita R, Yamamoto M, Kotake Y, Ishizaka A, Takeda J: Infusion of the  $\beta$ -adrenergic blocker esmolol attenuates myocardial dysfunction in septic rats. *Crit Care Med* 2005; 33:2294–301
26. Boissier F, Razazi K, Seemann A, Bedet A, Thille AW, de Prost N, Lim P, Brun-Buisson C, Mekontso Dessap A: Left ventricular systolic dysfunction during septic shock: The role of loading conditions. *Intensive Care Med* 2017; 43:633–42
27. Swedberg K, Komajda M, Böhm M, Borer JS, Ford I, Dubost-Brama A, Lerebours G, Tavazzi L; SHIFT Investigators: Ivabradine and outcomes in chronic heart failure (SHIFT): A randomised placebo-controlled study. *Lancet* 2010; 376:875–85
28. Roubille F, Tardif JC: New therapeutic targets in cardiology: Heart failure and arrhythmia: HCN channels. *Circulation* 2013; 127:1986–96
29. Wei C, Al Kattani N, Louis H, Albuisson E, Levy B, Kimmoun A: If channel inhibition with ivabradine does not improve cardiac and vascular function in experimental septic shock. *Shock* 2016; 46:297–303
30. Sanfilippo F, Corredor C, Fletcher N, Landesberg G, Benedetto U, Foex P, Cecconi M: Diastolic dysfunction and mortality in septic patients: A systematic review and meta-analysis. *Intensive Care Med* 2015; 41:1004–13
31. Rudiger A, Singer M: Mechanisms of sepsis-induced cardiac dysfunction. *Crit Care Med* 2007; 35:1599–608
32. Montmollin E de, Aboab V, Mansart A, Annane D: Bench-to-bedside review:  $\beta$ -Adrenergic modulation in sepsis. *Crit Care Lond Engl* 2009; 13:230
33. Gentry-Smetana S, Redford D, Moore D, Larson DF: Direct effects of volatile anesthetics on cardiac function. *Perfusion* 2008; 23:43–7

## ANESTHESIOLOGY REFLECTIONS FROM THE WOOD LIBRARY-MUSEUM

### Byline Backstory No. 1: A Twice-Burned Toddler Finds Anesthetic Relief

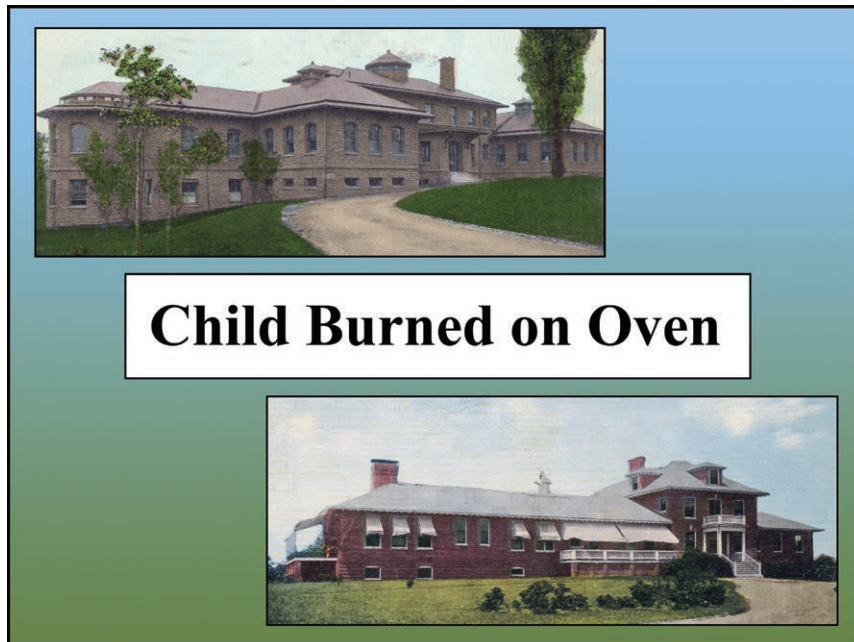

Southwest of Philadelphia, my father, Hank Bause, attended Crozer Seminary and heard a Crozer alumnus, Reverend Martin Luther King, Jr., practice his sermons. One of Dad's vivid memories as a seminarian was driving me, his 9-month-old son, to Crozer Hospital (*upper left*) after I had toddled into the kitchen and planted both hands down upon the open door of our heated oven. The *Chester Times* headlined this incident as "Child Burned on Oven." After my father graduated from Crozer, he drove my mother and me to Stratham, New Hampshire, so he could serve as a fledgling pastor there. Less than a year after my first-degree burns at Crozer, I suffered second-degree ones in Stratham. From there, my mother Suzanne would rush her hyperactive toddler to nearby Exeter Hospital (*lower right*) for burns from scalding tea water that I had pulled down over my right arm. Perhaps the anguish of my subsequent scarring and childhood nightmares of "roasting, like a turkey in an oven" motivated my future pursuit of the relief of pain...as an anesthesiologist. (Copyright © the American Society of Anesthesiologists' Wood Library-Museum of Anesthesiology.)

*George S. Bause, M.D., M.P.H., Clinical Associate Professor, Case Western Reserve University, Cleveland, Ohio.*
